# Supplementary material
Source: PubMed Central journal article supplement (PMC10069186)
Supplement: sj-pdf-1-eso-10.1177_23969873221144813.pdf [file sj-pdf-1-eso-10.1177_23969873221144813.pdf]

**Supplementary tables and figures:**

**Supplementary Table 1.** Descriptive statistics of the German Version of the Subarachnoid Haemorrhage Outcome Tool (aneurysmal cases only; n=73)

|                | Items | Mean<br>(SD)   | Median | IQR  | Range | Skew-<br>ness | %<br>score 0 | %<br>score 2 | Mean inter-<br>item<br>correlation |
|----------------|-------|----------------|--------|------|-------|---------------|--------------|--------------|------------------------------------|
| 4 domains      |       |                |        |      |       |               |              |              |                                    |
| Social         | 14    | 1.03<br>(0.84) | 1      | 1.25 | 0-2   | -0.06         | 2.7          | 4.1          | 0.53                               |
| Physical       | 13    | 1.31<br>(0.79) | 2      | 2    | 0-2   | -0.62         | 0            | 6.8          | 0.27                               |
| Cognitive      | 13    | 1.28<br>(0.77) | 1      | 1    | 0-2   | -0.53         | 1.3          | 4.1          | 0.46                               |
| Emotional      | 16    | 1.36<br>(0.77) | 2      | 2    | 0-2   | -0.71         | 0            | 0            | 0.38                               |
| Total<br>SAHOT | 56    | 1.21<br>(0.81) | 1      | 1    | 0-2   | -0.40         | 0            | 0            | 0.36                               |

IQR, Interquartile Range

% score 0, percentage of lowest possible score

% score 2, percentage of highest possible score

SAHOT, Subarachnoid Haemorrhage Outcome Tool

**Supplementary Table 2.** Reliability - Internal consistency and test-retest reliability  
(aneurysmal cases only)

| <b>SAHOT Domain</b> | <b>No. of Items</b> | <b>Cronbach`s <math>\alpha</math><br/>(n=73)</b> | <b>Intraclass correlation<br/>coefficient (n=54)</b> |
|---------------------|---------------------|--------------------------------------------------|------------------------------------------------------|
| Social              | 14                  | 0.94                                             | 0.87                                                 |
| Physical            | 13                  | 0.83                                             | 0.87                                                 |
| Cognitive           | 13                  | 0.92                                             | 0.86                                                 |
| Emotional           | 16                  | 0.92                                             | 0.84                                                 |
| SAHOT Total         | 56                  | 0.97                                             | 0.86                                                 |

SD: standard deviation

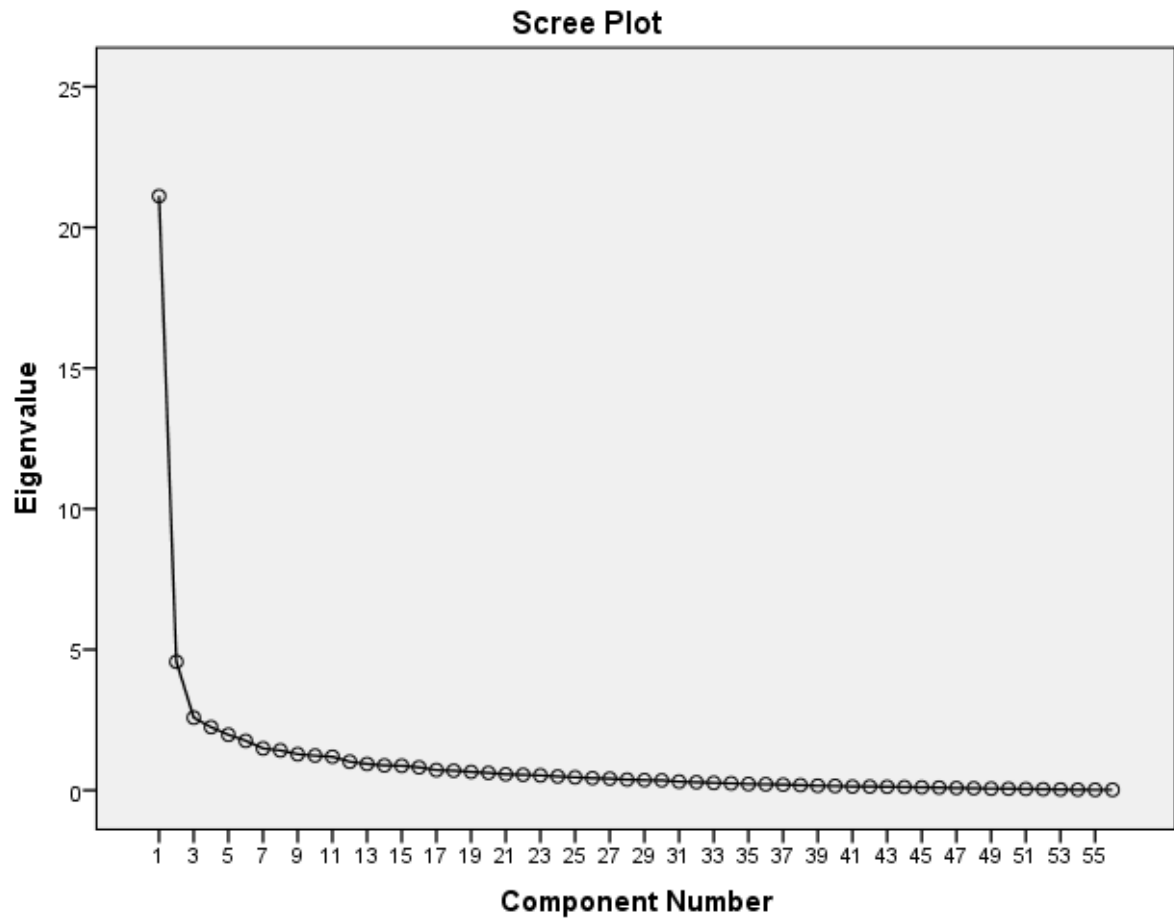

**Supplementary Figure 1.** Scree plot illustrates Eigenvalues for each factor of the German version of the subarachnoid haemorrhage outcome tool.

**Supplementary Table 3.** Construct validity (aneurysmal cases only)

| <b>SAHOT Domain</b>   | <b>Measure</b> | <b>Pearson correlation (n=70)</b> |
|-----------------------|----------------|-----------------------------------|
| General/ social roles | QOLIBRI        | -0.35*                            |
|                       | EQ-5D          | 0.64**                            |
| Physical              | QOLIBRI        | -0.64**                           |
|                       | EQ-5D Mobility | 0.72**                            |
|                       | EQ-5D Pain     | 0.48**                            |
| Cognitive             | QOLIBRI        | -0.72**                           |
| Emotional             | HADS           | 0.73*                             |
|                       | QOLIBRI        | -0.39**                           |
|                       | EQ-5D          | 0.62**                            |
| SAHOT Total           | QOLIBRI        | -0.76**                           |
|                       | EQ-5D          | 0.79**                            |
|                       | EQ VAS         | -0.63**                           |
|                       | mRS            | 0.51**                            |
|                       | GOSE           | -0.52**                           |

SAHOT: Subarachnoid Haemorrhage Outcome Tool

QOLIBRI: Quality of Life After Brain Injury scale

HADS: Hospital Anxiety and Depression Scale

EQ-5D: EuroQol Quality of Life Scale-5D

EQ VAS: EuroQol Visual Analogue Scale

mRS: modified Rankin Scale

GOSE: extended version of the Glasgow Outcome Scale

\*\* p < 0.01

\* p < 0.05

**Supplementary Table 4.** Responsiveness – Subarachnoid haemorrhage outcome measures (aneurysmal cases only)

| <b>Measure</b>        | <b>Discharge score: median (range)</b> | <b>3 month score: median (range)</b> | <b>P</b> | <b>Effect size (n=28)</b> |
|-----------------------|----------------------------------------|--------------------------------------|----------|---------------------------|
| 4 domains             |                                        |                                      |          |                           |
| Social                | 20 (1-28)                              | 13 (0-28)                            | 0.007    | -0.76                     |
| Physical              | 21 (11-26)                             | 17 (1-26)                            | 0.039    | -0.57                     |
| cognitive             | 22 (12-26)                             | 20 (0-26)                            | 0.134    | -0.41                     |
| emotional             | 27 (16-31)                             | 24 (2-31)                            | 0.125    | -0.42                     |
| Raw total score SAHOT | 87 (52-111)                            | 71 (2-111)                           | 0.012    | -0.69                     |
| Ordinal SAHOT         | 7 (5-8)                                | 6 (1-8)                              | 0.036    | -0.57                     |
| mRS                   | 2 (0-5)                                | 1.5 (0-5)                            | 0.072    | -0.41                     |
| GOSE                  | 6 (3-8)                                | 6.5 (3-8)                            | 0.181    | 0.30                      |

SAHOT: Subarachnoid Haemorrhage Outcome Tool

mRS: modified Rankin Scale

GOSE: extended version of the Glasgow Outcome Scale
