# Supplementary material
Source: PubMed Central journal article supplement (PMC10069186)
Supplement: sj-pdf-2-eso-10.1177_23969873221144813.pdf [file sj-pdf-2-eso-10.1177_23969873221144813.pdf]

## SAHOT

Fragebogen zur Beurteilung der Auswirkungen nach einer Subarachnoidalblutung

Dieser Fragebogen dient dazu, die Genesung nach einer Subarachnoidalblutung zum aktuellen Zeitpunkt zu beurteilen. Der Patient/die Patientin und sein oder ihr Angehöriger sollten jeweils einen eigenen Fragebogen ausfüllen und sich dabei nicht austauschen.

- Bitte denken Sie an die Situation VOR der Blutung und vergleichen Sie sie damit, wie die folgenden Aspekte des täglichen Lebens JETZT sind (d. h. in dieser Woche).
- Bitte kreisen Sie die Antwort ein, die diese VERÄNDERUNG für den jeweiligen Aspekt am besten beschreibt.
- Wenn Sie eine Aktivität noch nicht ausprobiert haben oder nicht sicher sind, ob Sie in der Lage wären, eine Aufgabe auszuführen, kreisen Sie für die Zwecke dieses Fragebogens „eine große/deutliche Veränderung“ ein.
- Wenn Sie eine Aktivität vor der Blutung nicht durchgeführt haben, wählen Sie bitte „n. z.“.

### 1. Allgemeine Aspekte des täglichen Lebens

|                                                                                        |                   |                    |                                  |       |
|----------------------------------------------------------------------------------------|-------------------|--------------------|----------------------------------|-------|
| Funktionsfähigkeit insgesamt                                                           | Keine Veränderung | Mäßige Veränderung | Große bzw. deutliche Veränderung | n. z. |
| Körperliche Aktivitäten im Alltag<br><i>(z. B. Gehen, Treppen steigen)</i>             | Keine Veränderung | Mäßige Veränderung | Große bzw. deutliche Veränderung | n. z. |
| Andere Menschen treffen<br><i>(Personen außerhalb des Kollegenkreises/der Familie)</i> | Keine Veränderung | Mäßige Veränderung | Große bzw. deutliche Veränderung | n. z. |
| Früheren Hobbys nachgehen                                                              | Keine Veränderung | Mäßige Veränderung | Große bzw. deutliche Veränderung | n. z. |
| Tätigkeiten im Haushalt                                                                | Keine Veränderung | Mäßige Veränderung | Große bzw. deutliche Veränderung | n. z. |
| Tagesausflüge/abendliche Unternehmungen                                                | Keine Veränderung | Mäßige Veränderung | Große bzw. deutliche Veränderung | n. z. |
| Qualität der Beziehung zu den engsten Bezugspersonen                                   | Keine Veränderung | Mäßige Veränderung | Große bzw. deutliche Veränderung | n. z. |
| Kreuzen Sie bitte an, ob die Beziehung jetzt besser [ ] oder schlechter [ ] ist.       |                   |                    |                                  |       |
| Qualität der Beziehung zu anderen Menschen                                             | Keine Veränderung | Mäßige Veränderung | Große bzw. deutliche Veränderung | n. z. |

## SAHOT: SubArachnoid Haemorrhage Outcome Tool

|                                                                                       |                      |                       |                                        |       |
|---------------------------------------------------------------------------------------|----------------------|-----------------------|----------------------------------------|-------|
| Dinge allein unternehmen<br><i>(z. B. Einkaufen, Ausgehen)</i>                        | Keine<br>Veränderung | Mäßige<br>Veränderung | Große bzw.<br>deutliche<br>Veränderung | n. z. |
| Zurechtkommen an überfüllten,<br>belebten oder lauten Orten                           | Keine<br>Veränderung | Mäßige<br>Veränderung | Große bzw.<br>deutliche<br>Veränderung | n. z. |
| Schlafmuster<br><i>(tagsüber oder nachts)</i>                                         | Keine<br>Veränderung | Mäßige<br>Veränderung | Große bzw.<br>deutliche<br>Veränderung | n. z. |
| Sexualleben                                                                           | Keine<br>Veränderung | Mäßige<br>Veränderung | Große bzw.<br>deutliche<br>Veränderung | n. z. |
| Grundlegende Selbstpflege<br><i>(z. B. Fähigkeit, sich zu waschen und anzuziehen)</i> | Keine<br>Veränderung | Mäßige<br>Veränderung | Große bzw.<br>deutliche<br>Veränderung | n. z. |
| Sportliche Betätigung in der Freizeit                                                 | Keine<br>Veränderung | Mäßige<br>Veränderung | Große bzw.<br>deutliche<br>Veränderung | n. z. |

## 2. Körperliche Aspekte

|                                                                                                                          |                      |                       |                                        |       |
|--------------------------------------------------------------------------------------------------------------------------|----------------------|-----------------------|----------------------------------------|-------|
| Körperliche Erschöpfung/Müdigkeit<br><i>(d. h. wie viel man tun kann, bevor man aufhören und sich<br/>ausruhen muss)</i> | Keine<br>Veränderung | Mäßige<br>Veränderung | Große bzw.<br>deutliche<br>Veränderung | n. z. |
| Gleichgewicht beim Gehen                                                                                                 | Keine<br>Veränderung | Mäßige<br>Veränderung | Große bzw.<br>deutliche<br>Veränderung | n. z. |

**SAHOT:** SubArachnoid Haemorrhage Outcome Tool

|                                                                                                                                                  |                   |                    |                                  |       |
|--------------------------------------------------------------------------------------------------------------------------------------------------|-------------------|--------------------|----------------------------------|-------|
| <p><b>Ungeschicklichkeit</b><br/> <i>(veränderte Handschrift, Schwierigkeiten bei der Verwendung von Besteck, Umstoßen von Gegenständen)</i></p> | Keine Veränderung | Mäßige Veränderung | Große bzw. deutliche Veränderung | n. z. |
| <p><b>Stürze</b><br/> <i>(einschließlich Stolpern/Straucheln)</i></p>                                                                            | Keine Veränderung | Mäßige Veränderung | Große bzw. deutliche Veränderung | n. z. |
| <p><b>Kraft/Koordination der Arme und Hände</b></p>                                                                                              | Keine Veränderung | Mäßige Veränderung | Große bzw. deutliche Veränderung | n. z. |
| <p><b>Kraft/Koordination der Beine</b></p>                                                                                                       | Keine Veränderung | Mäßige Veränderung | Große bzw. deutliche Veränderung | n. z. |
| <p><b>Schmerzen</b></p>                                                                                                                          | Keine Veränderung | Mäßige Veränderung | Große bzw. deutliche Veränderung | n. z. |
| <p><b>Harnkontinenz</b></p>                                                                                                                      | Keine Veränderung | Mäßige Veränderung | Große bzw. deutliche Veränderung | n. z. |
| <p><b>Sehvermögen</b><br/> <i>(ausgenommen Veränderungen bei der Verschreibung von Sehhilfen)</i></p>                                            | Keine Veränderung | Mäßige Veränderung | Große bzw. deutliche Veränderung | n. z. |
| <p><b>Hörvermögen</b></p>                                                                                                                        | Keine Veränderung | Mäßige Veränderung | Große bzw. deutliche Veränderung | n. z. |
| <p><b>Geruchs-/Geschmackssinn</b></p>                                                                                                            | Keine Veränderung | Mäßige Veränderung | Große bzw. deutliche Veränderung | n. z. |

**SAHOT: SubArachnoid Haemorrhage Outcome Tool**

|                                      |                   |                    |                                  |       |
|--------------------------------------|-------------------|--------------------|----------------------------------|-------|
| Schlucken von Speisen oder Getränken | Keine Veränderung | Mäßige Veränderung | Große bzw. deutliche Veränderung | n. z. |
| Wortfindung beim Sprechen            | Keine Veränderung | Mäßige Veränderung | Große bzw. deutliche Veränderung | n. z. |

**3. Kognitive Aspekte (Denken)**

|                                                                                                  |                   |                    |                                  |       |
|--------------------------------------------------------------------------------------------------|-------------------|--------------------|----------------------------------|-------|
| Geistige Erschöpfung<br><i>(d. h. Müdigkeit bei geistigen Aufgaben)</i>                          | Keine Veränderung | Mäßige Veränderung | Große bzw. deutliche Veränderung | n. z. |
| Kurzzeitgedächtnis                                                                               | Keine Veränderung | Mäßige Veränderung | Große bzw. deutliche Veränderung | n. z. |
| Langzeitgedächtnis<br><i>(d. h. sich an Ereignisse erinnern, die mehrere Jahre zurückliegen)</i> | Keine Veränderung | Mäßige Veränderung | Große bzw. deutliche Veränderung | n. z. |
| Eine neue Fertigkeit erlernen                                                                    | Keine Veränderung | Mäßige Veränderung | Große bzw. deutliche Veränderung | n. z. |
| Konzentration                                                                                    | Keine Veränderung | Mäßige Veränderung | Große bzw. deutliche Veränderung | n. z. |
| Ablenkbarkeit                                                                                    | Keine Veränderung | Mäßige Veränderung | Große bzw. deutliche Veränderung | n. z. |

**SAHOT:** SubArachnoid Haemorrhage Outcome Tool

|                                                                      |                      |                       |                                        |       |
|----------------------------------------------------------------------|----------------------|-----------------------|----------------------------------------|-------|
| Multitasking<br><i>(d. h. zwei oder mehr Dinge gleichzeitig tun)</i> | Keine<br>Veränderung | Mäßige<br>Veränderung | Große bzw.<br>deutliche<br>Veränderung | n. z. |
| Sich an die Namen vertrauter Personen<br>erinnern                    | Keine<br>Veränderung | Mäßige<br>Veränderung | Große bzw.<br>deutliche<br>Veränderung | n. z. |
| Gesichter erkennen                                                   | Keine<br>Veränderung | Mäßige<br>Veränderung | Große bzw.<br>deutliche<br>Veränderung | n. z. |
| Fähigkeit, in einem Gespräch den eigenen<br>Standpunkt zu vermitteln | Keine<br>Veränderung | Mäßige<br>Veränderung | Große bzw.<br>deutliche<br>Veränderung | n. z. |
| Fähigkeit, in Diskussionen mit anderen<br>Kompromisse zu schließen   | Keine<br>Veränderung | Mäßige<br>Veränderung | Große bzw.<br>deutliche<br>Veränderung | n. z. |
| Fähigkeit, Gefahren zu erkennen                                      | Keine<br>Veränderung | Mäßige<br>Veränderung | Große bzw.<br>deutliche<br>Veränderung | n. z. |
| Orientierungsvermögen<br><i>(z. B. sich verlaufen)</i>               | Keine<br>Veränderung | Mäßige<br>Veränderung | Große bzw.<br>deutliche<br>Veränderung | n. z. |

**4. Verhaltensbezogene/psychologische Aspekte**

|                      |                      |                       |                                        |       |
|----------------------|----------------------|-----------------------|----------------------------------------|-------|
| Niedergeschlagenheit | Keine<br>Veränderung | Mäßige<br>Veränderung | Große bzw.<br>deutliche<br>Veränderung | n. z. |
|----------------------|----------------------|-----------------------|----------------------------------------|-------|

**SAHOT:** SubArachnoid Haemorrhage Outcome Tool

|                                                          |                   |                    |                                  |       |
|----------------------------------------------------------|-------------------|--------------------|----------------------------------|-------|
| Stimmungsschwankungen                                    | Keine Veränderung | Mäßige Veränderung | Große bzw. deutliche Veränderung | n. z. |
| Intensität der Gefühle (Emotionen)                       | Keine Veränderung | Mäßige Veränderung | Große bzw. deutliche Veränderung | n. z. |
| Leicht zum Weinen bzw. zum Lachen zu bringen             | Keine Veränderung | Mäßige Veränderung | Große bzw. deutliche Veränderung | n. z. |
| Fähigkeit, die eigenen Reaktionen zu kontrollieren       | Keine Veränderung | Mäßige Veränderung | Große bzw. deutliche Veränderung | n. z. |
| Reizbarkeit                                              | Keine Veränderung | Mäßige Veränderung | Große bzw. deutliche Veränderung | n. z. |
| Besorgtheit                                              | Keine Veränderung | Mäßige Veränderung | Große bzw. deutliche Veränderung | n. z. |
| Angstgefühle                                             | Keine Veränderung | Mäßige Veränderung | Große bzw. deutliche Veränderung | n. z. |
| Gefühle von Paranoia<br>(das Gefühl, verfolgt zu werden) | Keine Veränderung | Mäßige Veränderung | Große bzw. deutliche Veränderung | n. z. |
| Innere Unruhe (Agitiertheit)                             | Keine Veränderung | Mäßige Veränderung | Große bzw. deutliche Veränderung | n. z. |

**SAHOT:** SubArachnoid Haemorrhage Outcome Tool

|                                                                               |                      |                       |                                        |       |
|-------------------------------------------------------------------------------|----------------------|-----------------------|----------------------------------------|-------|
| Ruhelosigkeit<br><i>(Unfähigkeit stillzustehen)</i>                           | Keine<br>Veränderung | Mäßige<br>Veränderung | Große bzw.<br>deutliche<br>Veränderung | n. z. |
| Selbstvertrauen                                                               | Keine<br>Veränderung | Mäßige<br>Veränderung | Große bzw.<br>deutliche<br>Veränderung | n. z. |
| Wahrnehmung der Gedanken, Gefühle<br>und/oder<br>Bedürfnisse anderer Menschen | Keine<br>Veränderung | Mäßige<br>Veränderung | Große bzw.<br>deutliche<br>Veränderung | n. z. |
| Motivation                                                                    | Keine<br>Veränderung | Mäßige<br>Veränderung | Große bzw.<br>deutliche<br>Veränderung | n. z. |
| Sich in neuen Umgebungen wohlfühlen                                           | Keine<br>Veränderung | Mäßige<br>Veränderung | Große bzw.<br>deutliche<br>Veränderung | n. z. |
| Teilnahmslosigkeit                                                            | Keine<br>Veränderung | Mäßige<br>Veränderung | Große bzw.<br>deutliche<br>Veränderung | n. z. |
